# Supplementary material for: Theoretical investigation of proton collisions on prebiotic candidates: hydrogen cyanide polymers
Source: Royal Society of Chemistry journal article supplement (doi:10.1039/c7cp00826k), 2017-01-01
Supplement: c7cp00826k1.pdf [file c7cp00826k1.pdf]

## Theoretical investigation of proton collisions on prebiotic candidates: hydrogen cyanide polymers

Marie-Christine Bacchus-Montabonel

Univ Lyon, Université Claude Bernard Lyon 1, CNRS, Institut Lumière Matière, F-69622, VILLEURBANNE, France

### SUPPLEMENTARY INFORMATION

Fig. S1 Adiabatic potential energy curves of the  $^1A$  states of the proton-aminomalnonitrile charge transfer system in the perpendicular geometry. Black, entrance channel  $\{AMN + H^+\}$ ; color, charge transfer channels  $\{AMN^+ + H\}$ .

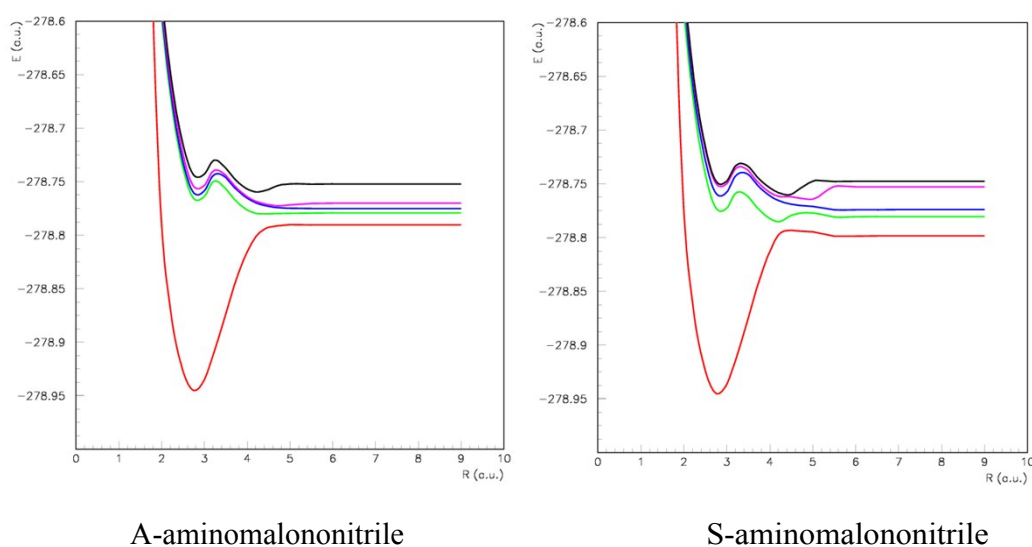

**Table S1** Proton-induced charge transfer cross sections in collisions of protons with Z-C-cyanomethanimine (in  $10^{-16} \text{cm}^2$ ).

| Velocity (a.u.) | $E_{\text{lab}}$ (eV) | along x | along y               | along z               | Mean xy value $\sigma_{//}$ | Mean xyz value $\sigma^{\text{xyz}}$ | Mean  |
|-----------------|-----------------------|---------|-----------------------|-----------------------|-----------------------------|--------------------------------------|-------|
| 0.015           | 5.7                   | 0.076   | $5.41 \times 10^{-3}$ | 0.014                 | 0.041                       | 0.032                                | 0.027 |
| 0.02            | 10.0                  | 0.151   | 0.028                 | $7.48 \times 10^{-3}$ | 0.089                       | 0.062                                | 0.048 |
| 0.03            | 22.6                  | 0.144   | 0.022                 | 0.013                 | 0.083                       | 0.060                                | 0.048 |
| 0.04            | 40.0                  | 0.290   | 0.021                 | 0.023                 | 0.155                       | 0.111                                | 0.089 |
| 0.05            | 63.0                  | 0.283   | 0.048                 | 0.027                 | 0.165                       | 0.119                                | 0.096 |
| 0.07            | 123.4                 | 0.637   | 0.089                 | 0.024                 | 0.363                       | 0.250                                | 0.194 |
| 0.08            | 161.1                 | 0.529   | 0.076                 | 0.022                 | 0.302                       | 0.209                                | 0.162 |
| 0.09            | 203.9                 | 0.465   | 0.109                 | 0.019                 | 0.287                       | 0.197                                | 0.153 |
| 0.1             | 251.8                 | 0.498   | 0.189                 | 0.017                 | 0.343                       | 0.234                                | 0.180 |
| 0.15            | 566.5                 | 0.992   | 0.576                 | 0.011                 | 0.784                       | 0.526                                | 0.398 |
| 0.2             | $1.0 \times 10^3$     | 1.082   | 0.616                 | $9.88 \times 10^{-3}$ | 0.849                       | 0.569                                | 0.429 |
| 0.3             | $2.3 \times 10^3$     | 0.801   | 0.443                 | $7.47 \times 10^{-3}$ | 0.622                       | 0.417                                | 0.315 |
| 0.4             | $4.0 \times 10^3$     | 0.554   | 0.356                 | $5.71 \times 10^{-3}$ | 0.455                       | 0.305                                | 0.230 |
| 0.5             | $6.3 \times 10^3$     | 0.398   | 0.299                 | $4.34 \times 10^{-3}$ | 0.349                       | 0.234                                | 0.176 |
| 0.6             | $9.1 \times 10^3$     | 0.297   | 0.251                 | $3.33 \times 10^{-3}$ | 0.274                       | 0.184                                | 0.139 |
| 0.7             | $12.3 \times 10^3$    | 0.229   | 0.210                 | $2.61 \times 10^{-3}$ | 0.219                       | 0.147                                | 0.111 |

**Table S2** Proton-induced charge transfer cross sections in collisions of protons with E-C-cyanomethanimine (in  $10^{-16} \text{cm}^2$ ).

| Velocity (a.u.) | $E_{\text{lab}}$ (eV) | along x              | along y               | along z               | Mean xy Value $\sigma_{//}$ | Mean xyz Value $\sigma^{\text{xyz}}$ | Mean  |
|-----------------|-----------------------|----------------------|-----------------------|-----------------------|-----------------------------|--------------------------------------|-------|
| 0.015           | 5.7                   | $9.2 \times 10^{-3}$ | $5.02 \times 10^{-3}$ | $3.70 \times 10^{-3}$ | 0.007                       | 0.006                                | 0.005 |
| 0.02            | 10.0                  | 0.069                | $8.64 \times 10^{-3}$ | $4.01 \times 10^{-3}$ | 0.039                       | 0.027                                | 0.021 |
| 0.03            | 22.6                  | 0.206                | $8.53 \times 10^{-3}$ | $4.91 \times 10^{-3}$ | 0.107                       | 0.073                                | 0.056 |
| 0.04            | 40.0                  | 0.281                | $9.62 \times 10^{-3}$ | $4.86 \times 10^{-3}$ | 0.145                       | 0.098                                | 0.075 |
| 0.05            | 63.0                  | 0.294                | 0.017                 | $4.58 \times 10^{-3}$ | 0.155                       | 0.105                                | 0.080 |
| 0.07            | 123.4                 | 0.254                | 0.010                 | $3.45 \times 10^{-3}$ | 0.132                       | 0.089                                | 0.068 |
| 0.08            | 161.1                 | 0.460                | 0.016                 | $2.95 \times 10^{-3}$ | 0.238                       | 0.160                                | 0.120 |
| 0.09            | 203.9                 | 0.787                | 0.030                 | $2.79 \times 10^{-3}$ | 0.408                       | 0.273                                | 0.206 |
| 0.1             | 251.8                 | 0.943                | 0.028                 | $2.91 \times 10^{-3}$ | 0.486                       | 0.325                                | 0.244 |
| 0.15            | 566.5                 | 0.615                | 0.107                 | $3.72 \times 10^{-3}$ | 0.361                       | 0.242                                | 0.182 |
| 0.2             | $1.0 \times 10^3$     | 1.647                | 0.290                 | $3.84 \times 10^{-3}$ | 0.968                       | 0.647                                | 0.486 |
| 0.3             | $2.3 \times 10^3$     | 2.342                | 0.339                 | $3.81 \times 10^{-3}$ | 1.340                       | 0.895                                | 0.672 |
| 0.4             | $4.0 \times 10^3$     | 2.112                | 0.319                 | $3.10 \times 10^{-3}$ | 1.216                       | 0.811                                | 0.609 |
| 0.5             | $6.3 \times 10^3$     | 1.922                | 0.275                 | $2.38 \times 10^{-3}$ | 1.098                       | 0.733                                | 0.551 |
| 0.6             | $9.1 \times 10^3$     | 1.748                | 0.229                 | $1.83 \times 10^{-3}$ | 0.989                       | 0.660                                | 0.495 |
| 0.7             | $12.3 \times 10^3$    | 1.557                | 0.191                 | $1.43 \times 10^{-3}$ | 0.874                       | 0.583                                | 0.438 |

**Table S3** Proton-induced charge transfer cross sections in collisions of protons with A aminimalononitrile (in  $10^{-16}\text{cm}^2$ ).

| Velocit<br>y (a.u.) | $E_{\text{lab}}$ (eV) | along x | along y | along z | Mean xyz<br>Value $\sigma^{\text{xyz}}$ |
|---------------------|-----------------------|---------|---------|---------|-----------------------------------------|
| 0.015               | 5.7                   | 0.264   | 0.454   | 5.573   | 2.097                                   |
| 0.02                | 10.0                  | 0.325   | 0.788   | 5.321   | 2.145                                   |
| 0.03                | 22.6                  | 0.564   | 1.231   | 5.682   | 2.493                                   |
| 0.04                | 40.0                  | 0.817   | 2.004   | 7.026   | 3.282                                   |
| 0.05                | 63.0                  | 0.720   | 2.264   | 7.835   | 3.606                                   |
| 0.07                | 123.4                 | 1.198   | 2.630   | 7.995   | 3.941                                   |
| 0.08                | 161.1                 | 1.104   | 2.641   | 7.670   | 3.805                                   |
| 0.09                | 203.9                 | 1.119   | 3.201   | 7.213   | 3.844                                   |
| 0.1                 | 251.8                 | 1.301   | 4.034   | 6.823   | 4.053                                   |
| 0.15                | 566.5                 | 2.529   | 6.096   | 4.957   | 4.527                                   |
| 0.2                 | $1.0 \times 10^3$     | 2.622   | 5.353   | 4.089   | 4.022                                   |
| 0.3                 | $2.3 \times 10^3$     | 1.833   | 3.336   | 2.609   | 2.593                                   |
| 0.4                 | $4.0 \times 10^3$     | 1.232   | 2.124   | 2.581   | 1.979                                   |
| 0.5                 | $6.3 \times 10^3$     | 0.863   | 1.441   | 2.683   | 1.662                                   |
| 0.6                 | $9.1 \times 10^3$     | 0.632   | 1.033   | 2.521   | 1.395                                   |
| 0.7                 | $12.3 \times 10^3$    | 0.480   | 0.774   | 2.240   | 1.165                                   |

**Table S4** Proton-induced charge transfer cross sections in collisions of protons with S aminimalononitrile (in  $10^{-16}\text{cm}^2$ ).

| Velocit<br>y (a.u.) | $E_{\text{lab}}$ (eV) | along x | along y | along z | Mean xyz<br>Value $\sigma^{\text{xyz}}$ |
|---------------------|-----------------------|---------|---------|---------|-----------------------------------------|
| 0.015               | 5.7                   | 0.033   | 0.820   | 1.707   | 0.853                                   |
| 0.02                | 10.0                  | 0.077   | 3.857   | 2.419   | 2.118                                   |
| 0.03                | 22.6                  | 0.076   | 6.997   | 5.858   | 4.310                                   |
| 0.04                | 40.0                  | 0.368   | 5.927   | 13.208  | 6.501                                   |
| 0.05                | 63.0                  | 0.699   | 6.353   | 17.056  | 8.036                                   |
| 0.07                | 123.4                 | 0.943   | 8.597   | 15.990  | 8.510                                   |
| 0.08                | 161.1                 | 0.922   | 10.709  | 15.641  | 9.091                                   |
| 0.09                | 203.9                 | 0.866   | 11.893  | 15.389  | 9.383                                   |
| 0.1                 | 251.8                 | 0.797   | 12.426  | 14.881  | 9.368                                   |
| 0.15                | 566.5                 | 0.490   | 10.790  | 11.540  | 7.607                                   |
| 0.2                 | $1.0 \times 10^3$     | 0.325   | 8.087   | 8.305   | 5.572                                   |
| 0.3                 | $2.3 \times 10^3$     | 0.174   | 4.656   | 4.886   | 3.239                                   |
| 0.4                 | $4.0 \times 10^3$     | 0.107   | 2.918   | 3.141   | 2.056                                   |
| 0.5                 | $6.3 \times 10^3$     | 0.072   | 1.971   | 2.575   | 1.539                                   |
| 0.6                 | $9.1 \times 10^3$     | 0.051   | 1.411   | 2.265   | 1.242                                   |
| 0.7                 | $12.3 \times 10^3$    | 0.038   | 1.056   | 1.989   | 1.028                                   |
